# Supplementary material for: Magnetogenetics: remote non-invasive magnetic activation of neuronal activity with a magnetoreceptor
Source: PubMed Central journal article supplement (PMC4692962; doi:10.1007/s11434-015-0902-0), 2015-09-14

a

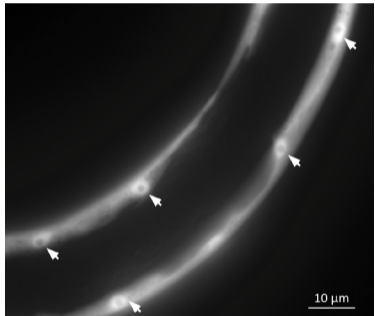

b

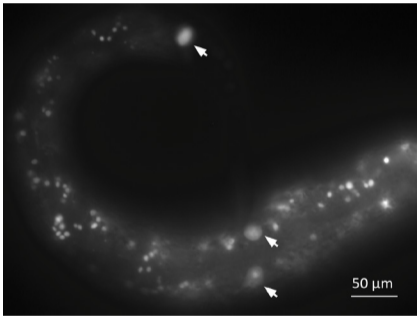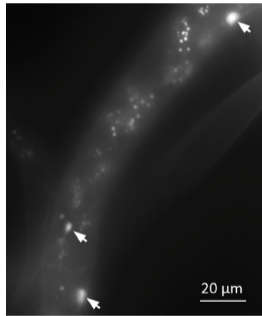

Supplement: 11434_2015_902_MOESM5_ESM.pdf [file 11434_2015_902_MOESM5_ESM.pdf]
